# Supplementary material for: Enantiomer-Specific Malathion Degradation by Gut Microbes of the Colorado Potato Beetle
Source: Research Square preprint supplement (doi:10.21203/rs.3.rs-6082506/v1), 2025-03-26
Supplement: Supplementary file 1 [file a160d55b5e24157d77ae312c.docx]

**Supplemental Information:**


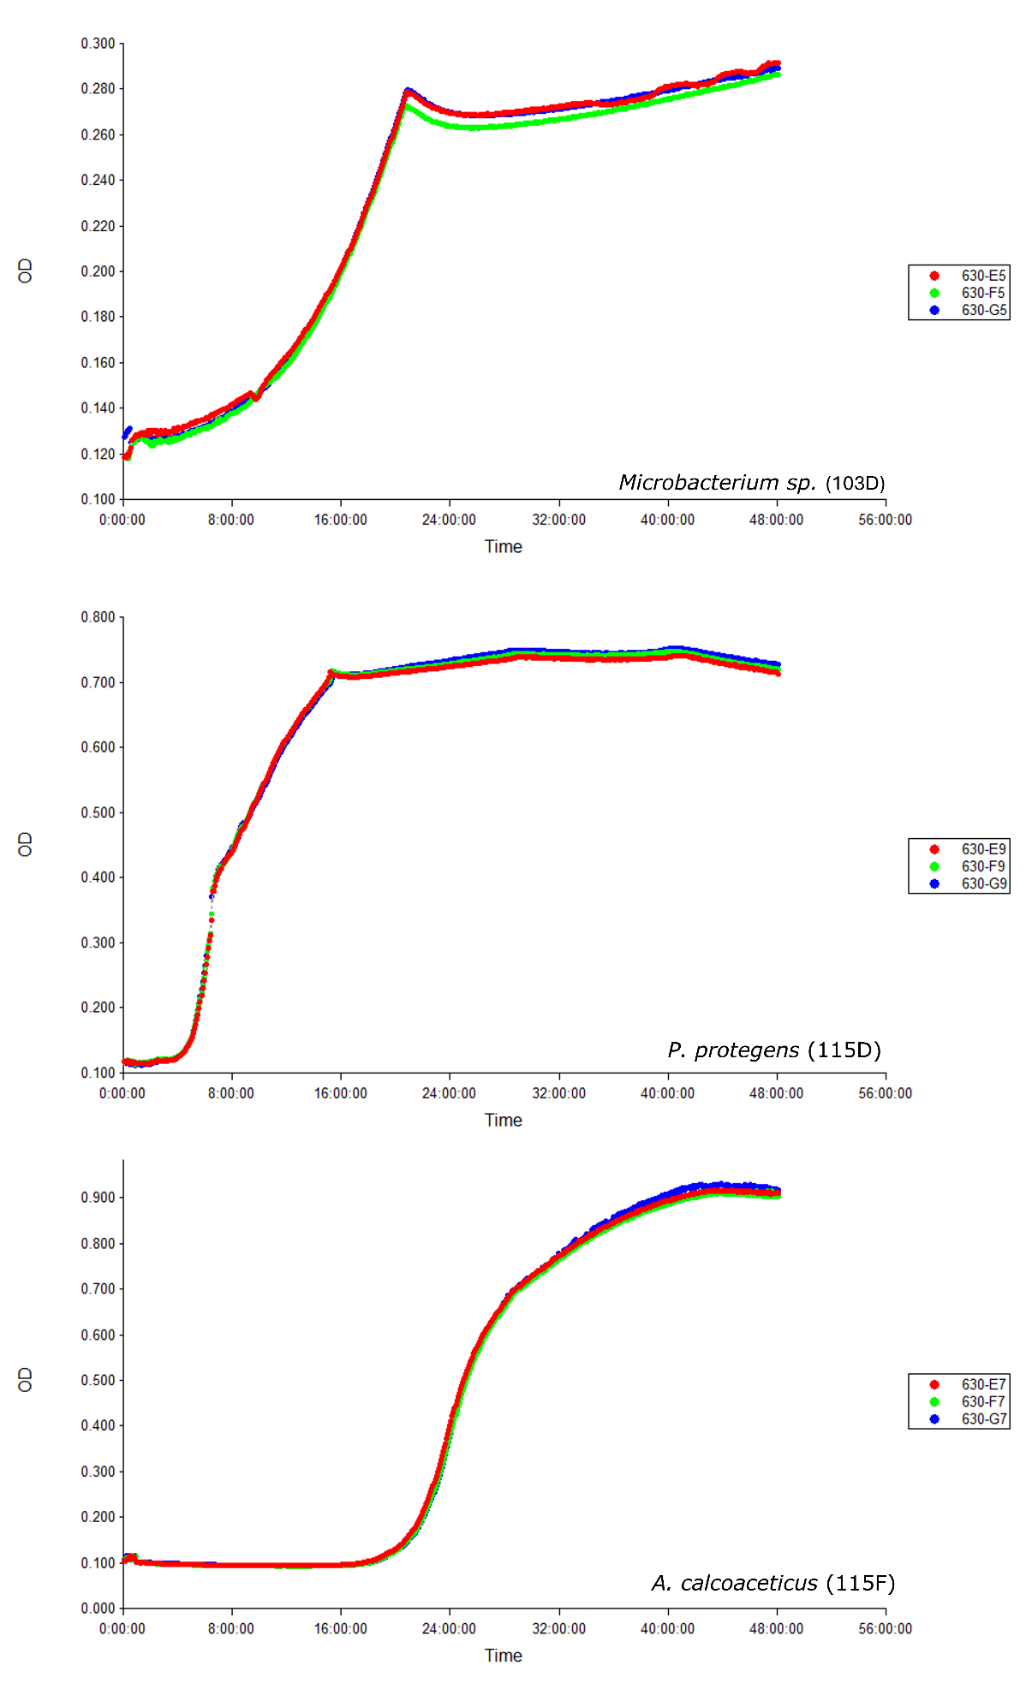


**Figure S1:** Growth curves of three isolates, *Acinetobacter calcoaceticus* (115f), *Pseudomonas protegens* (115d), and *Microbacterium sp.* (103d), under sole carbon source (malathion) media conditions.

**Figure S2.** Malathion metabolites detected using GC/MS (chromatograms provided below). Labeled with their CAS ID numbers. Metabolites display patterns of increasing over time and other increasing and decreasing preliminarily supporting the idea of production and subsequent further consumption of metabolites.

**103D metabolites**


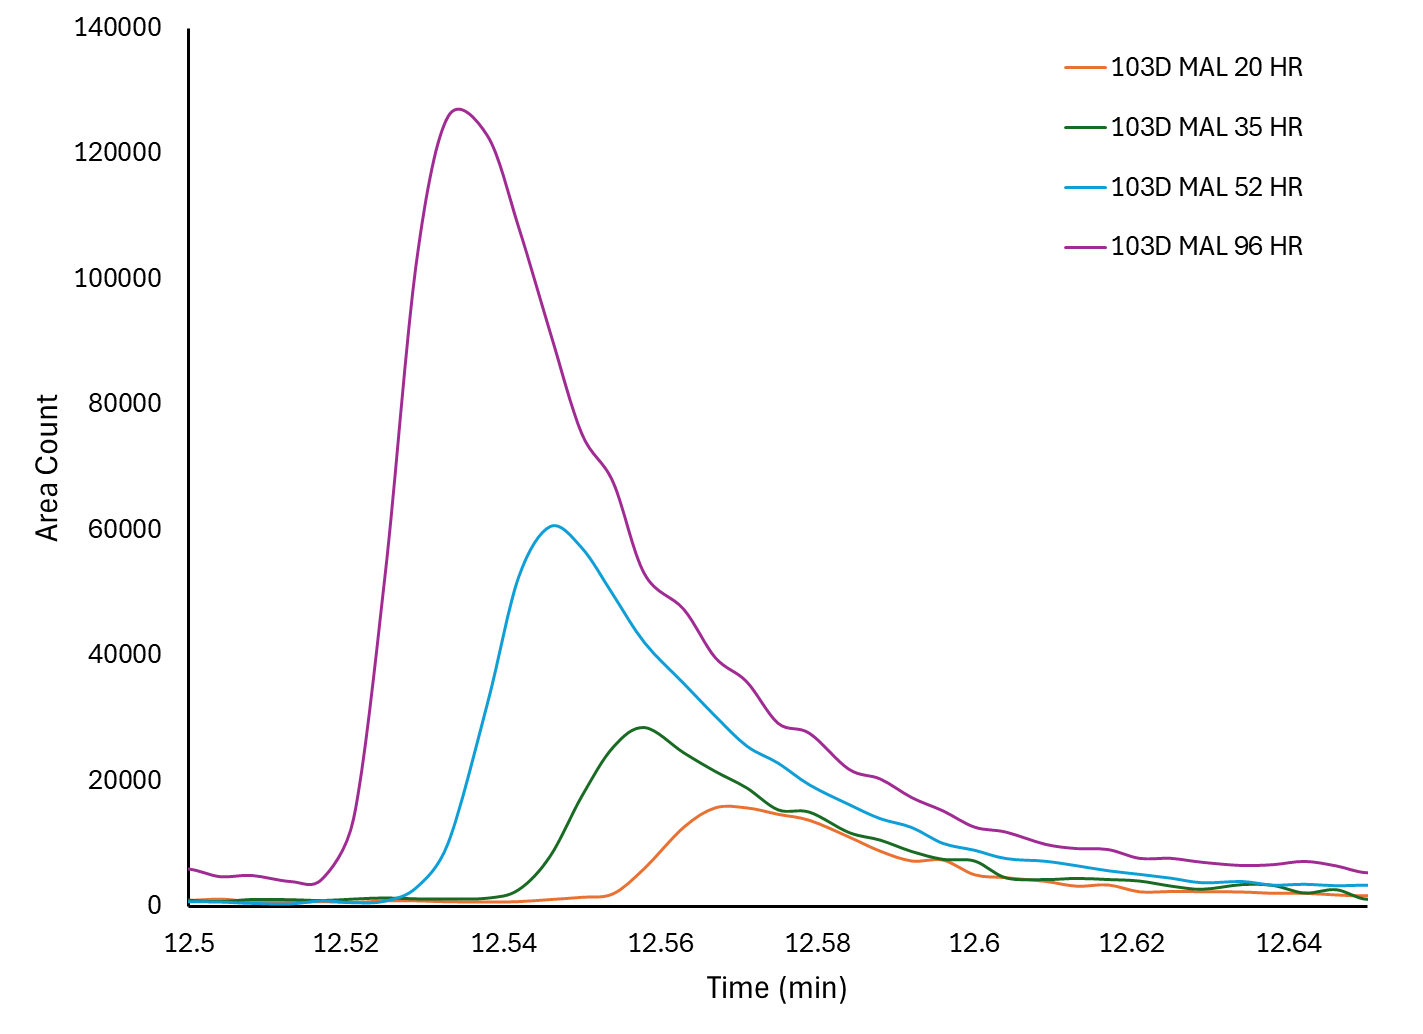


CAS 152-20-5 Increasing over time


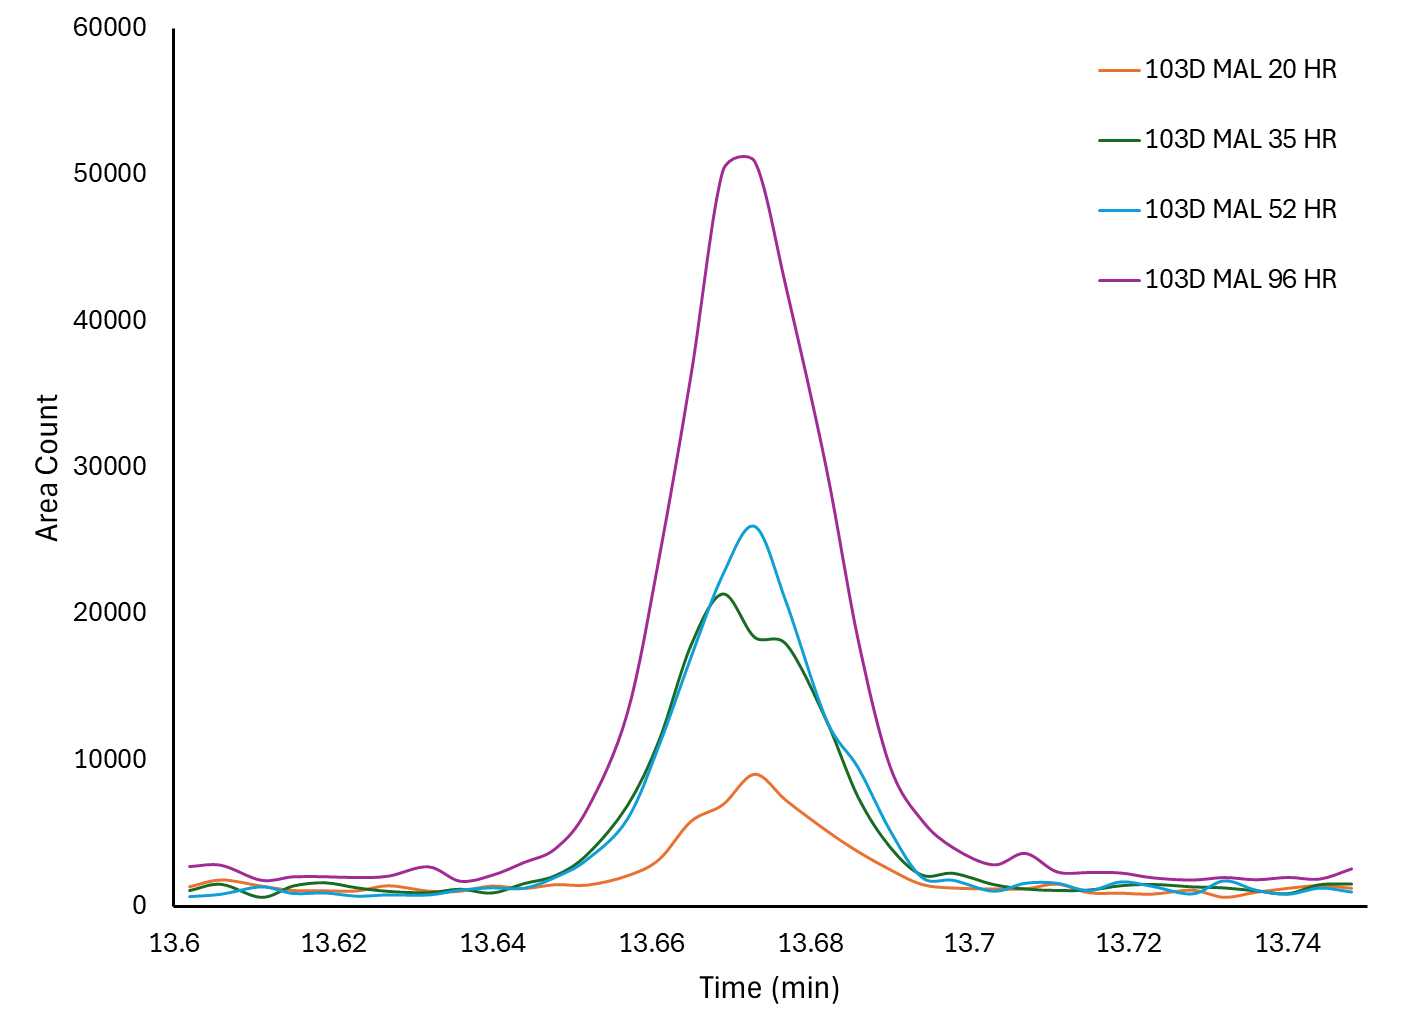


CAS 2953-29-9 Increasing over time


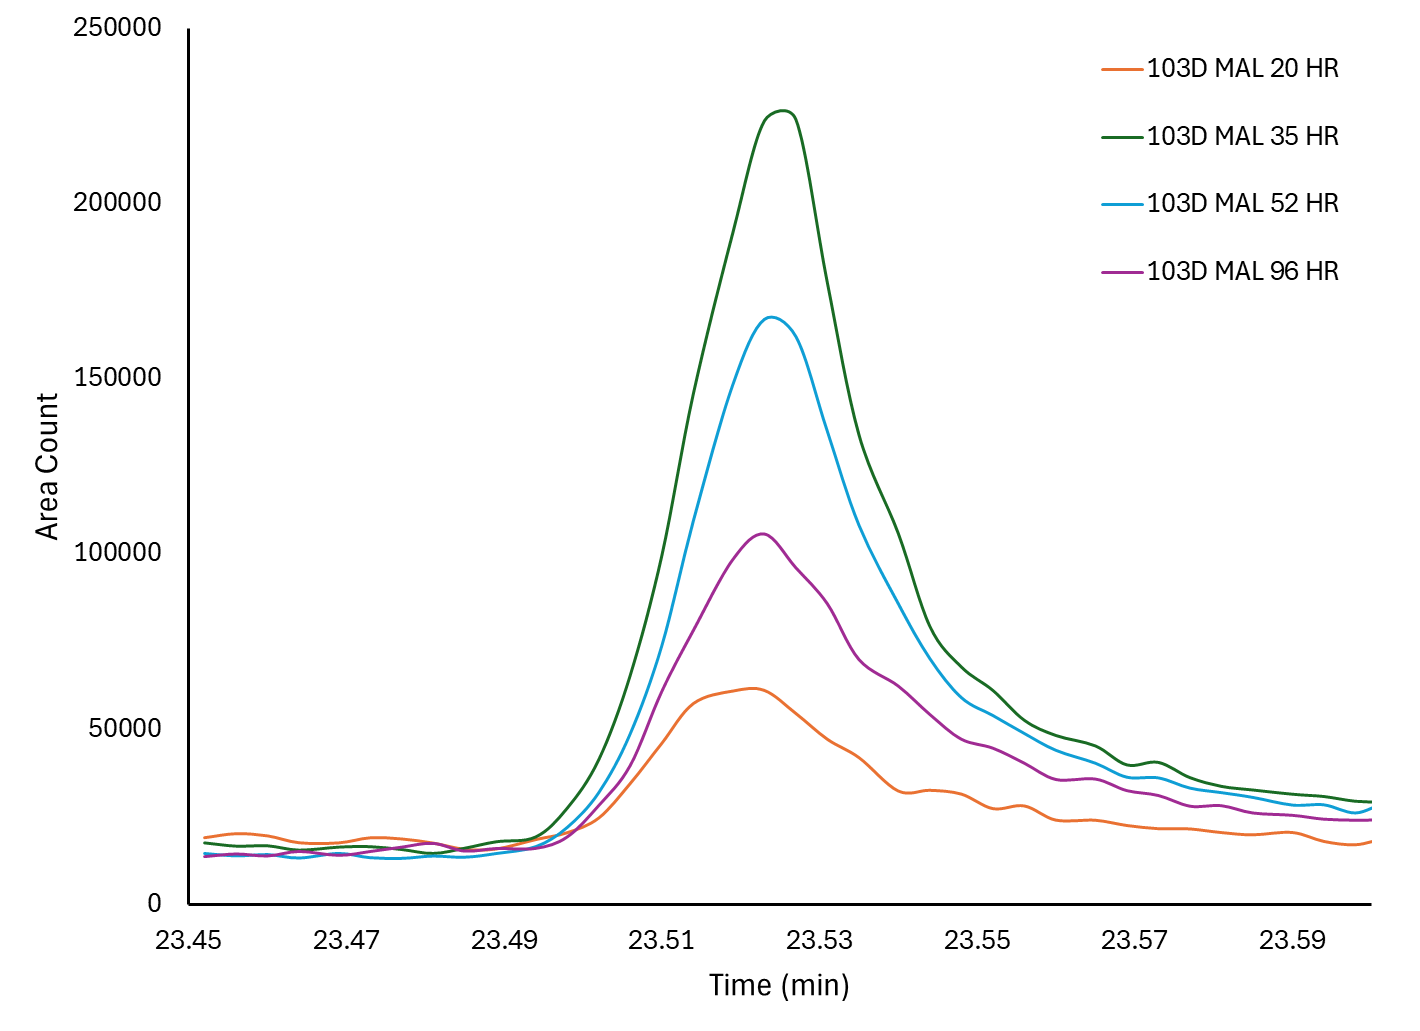


CAS 1190-29-0 Increasing then decreasing

115D metabolites


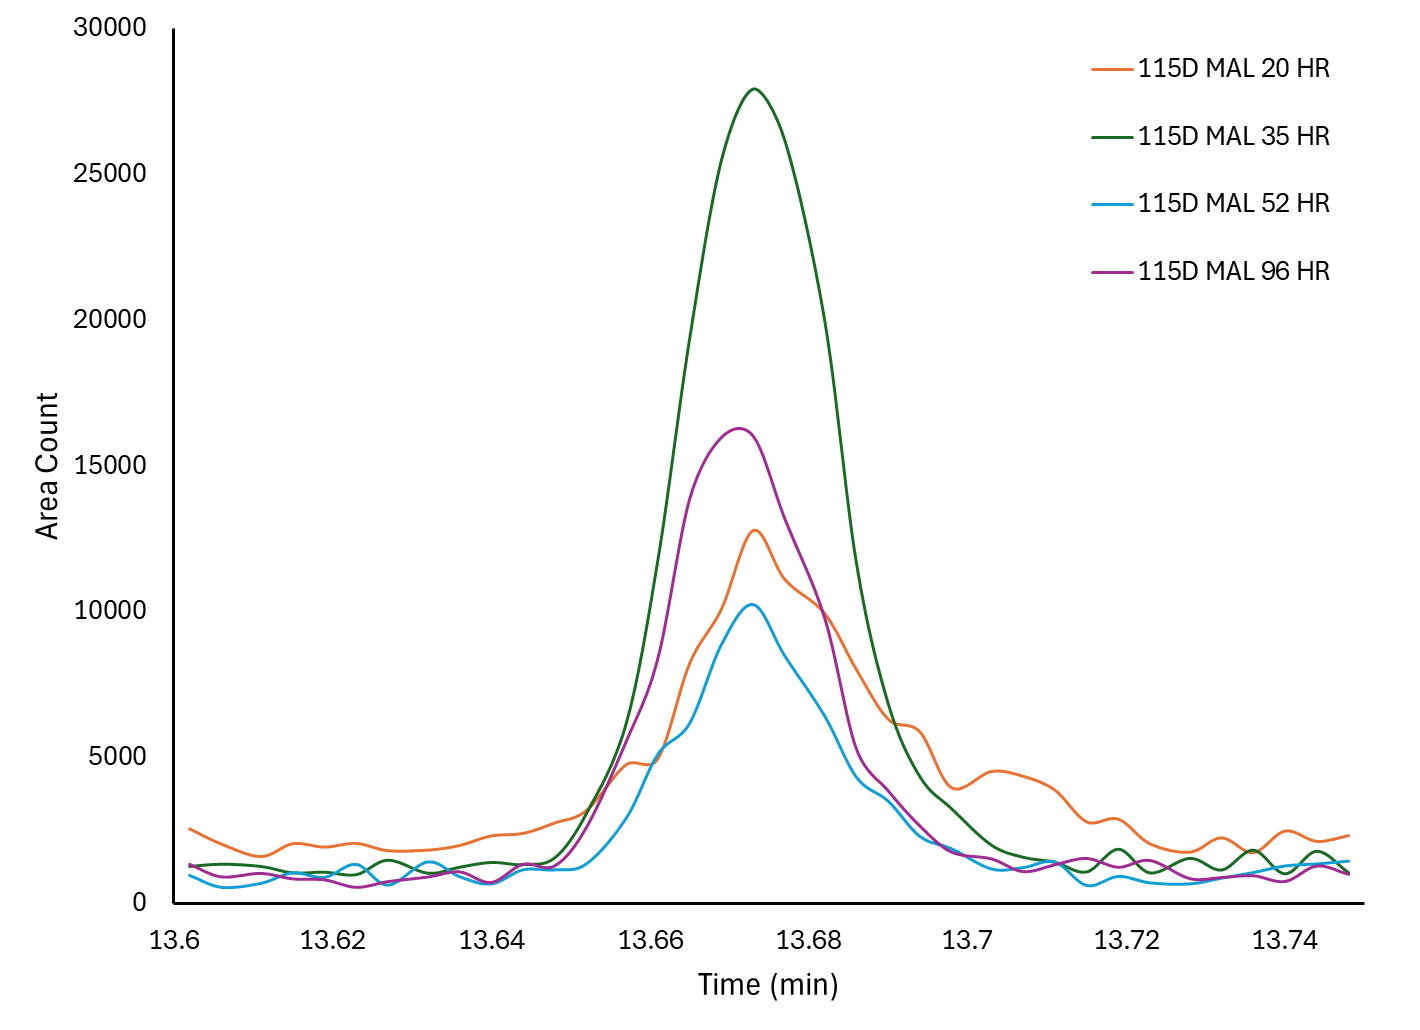


CAS 2953-29-9 Increasing then decreasing


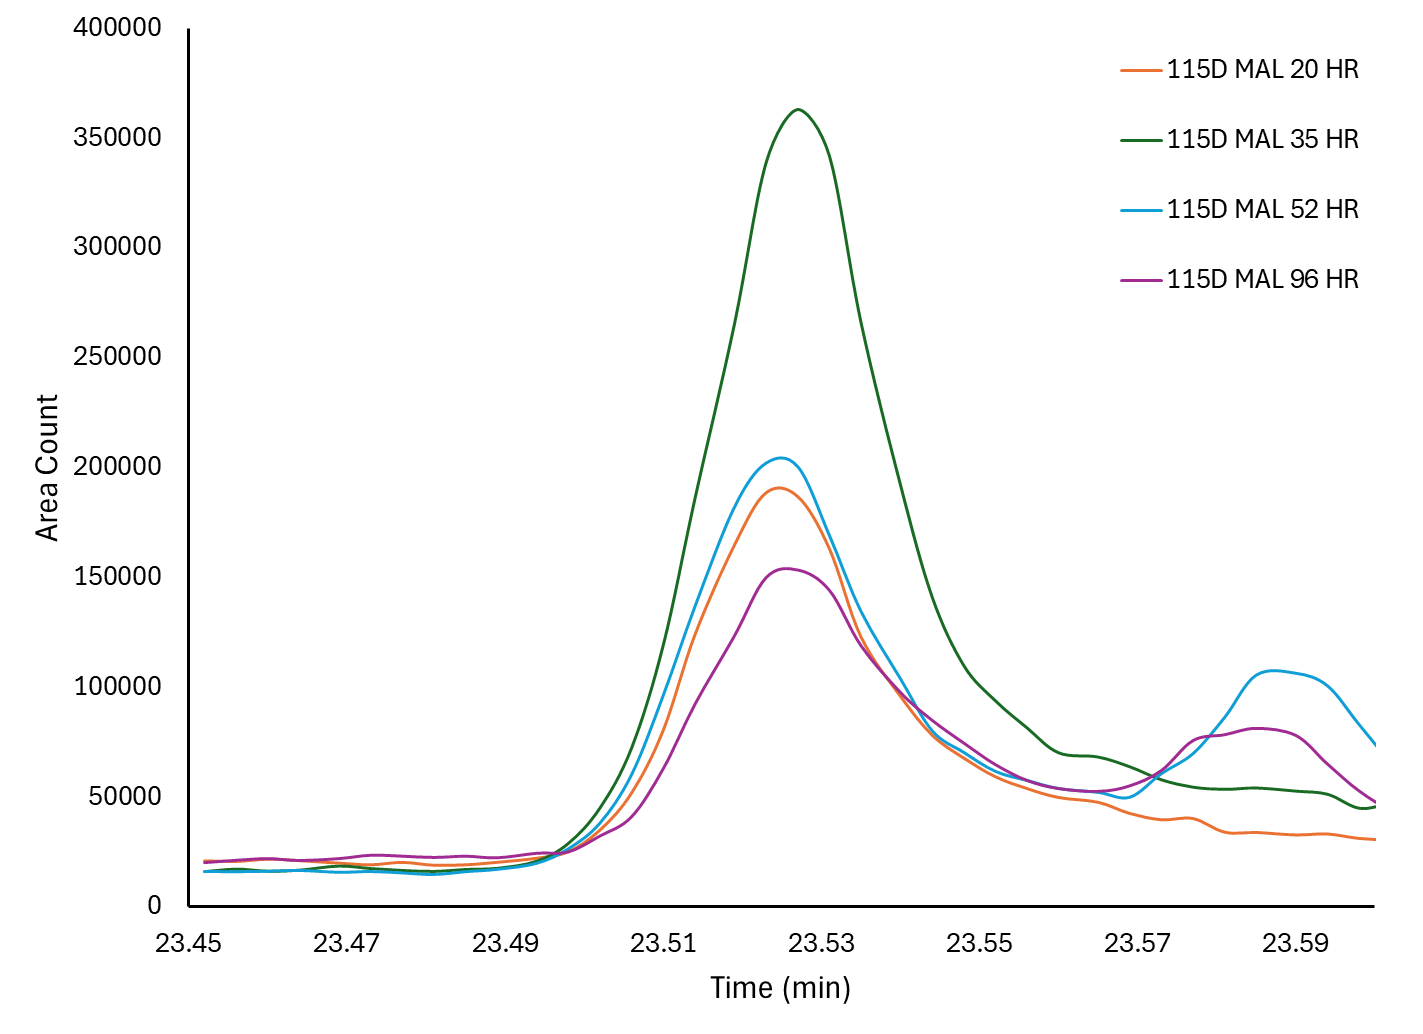


CAS 1190-29-0 Increasing then decreasing

115F Metabolites


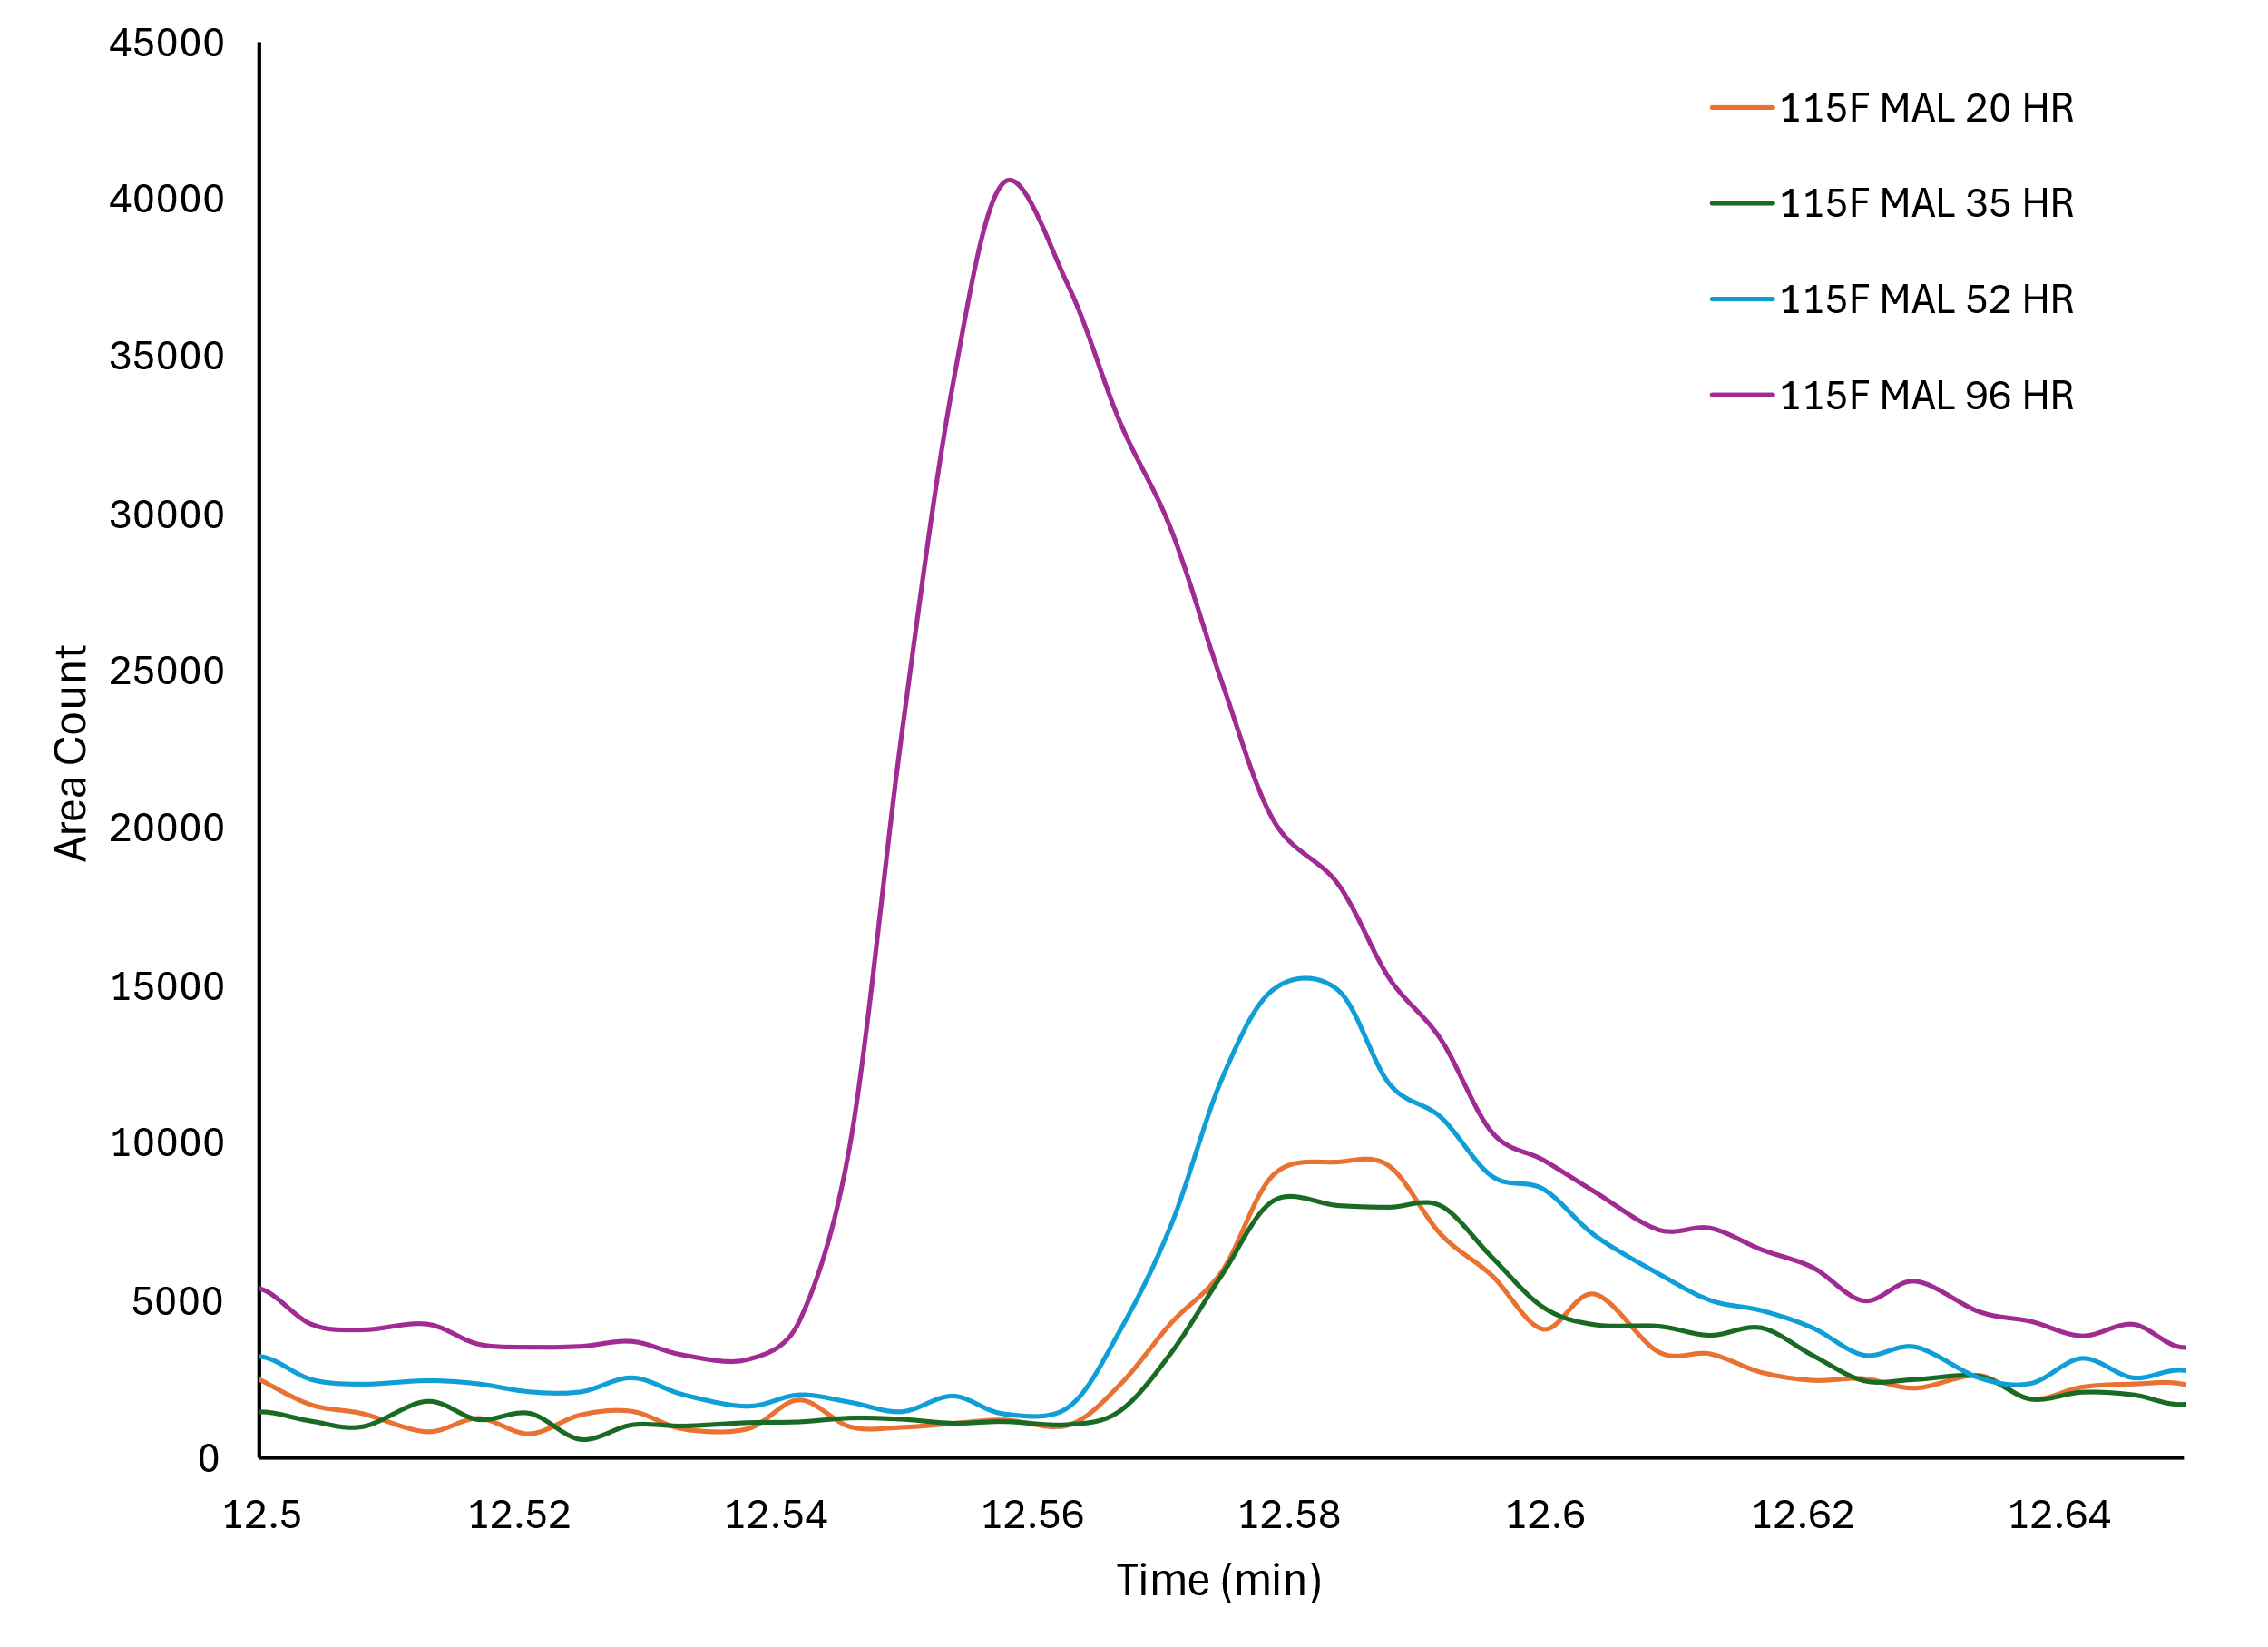


CAS 152-20-5 Increasing over time


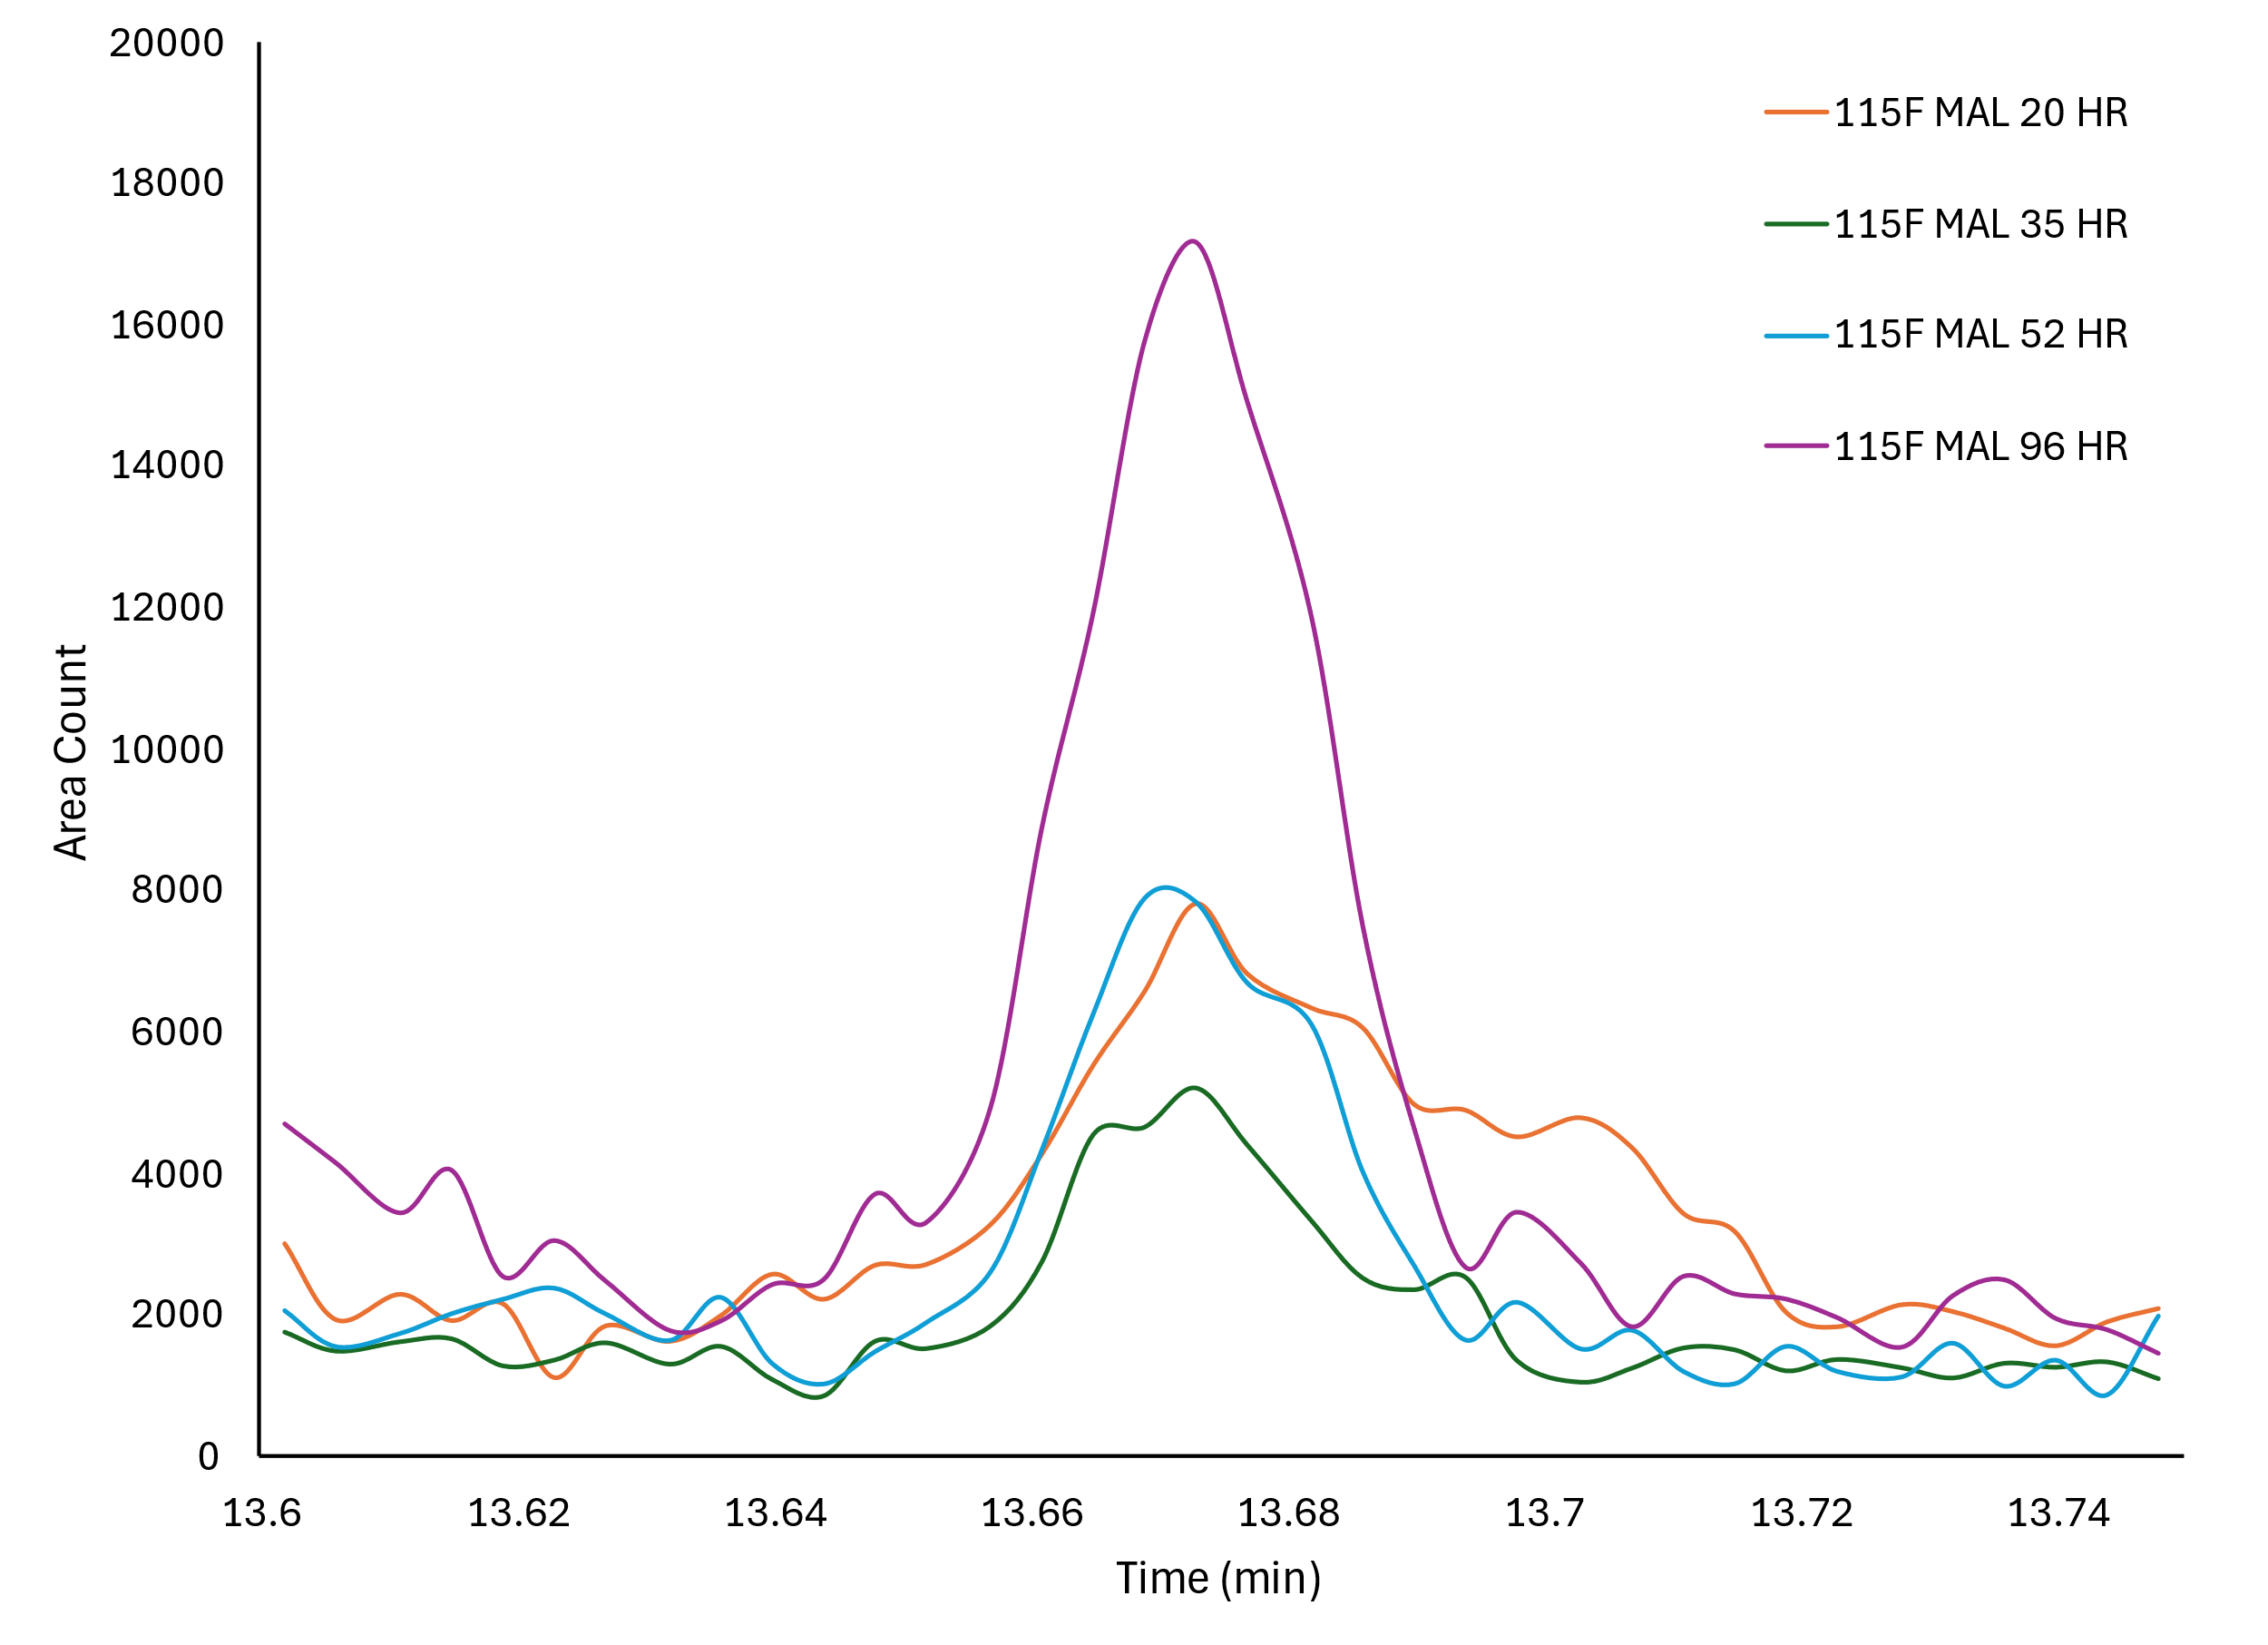


CAS 2953-29-9 Increasing then decreasing


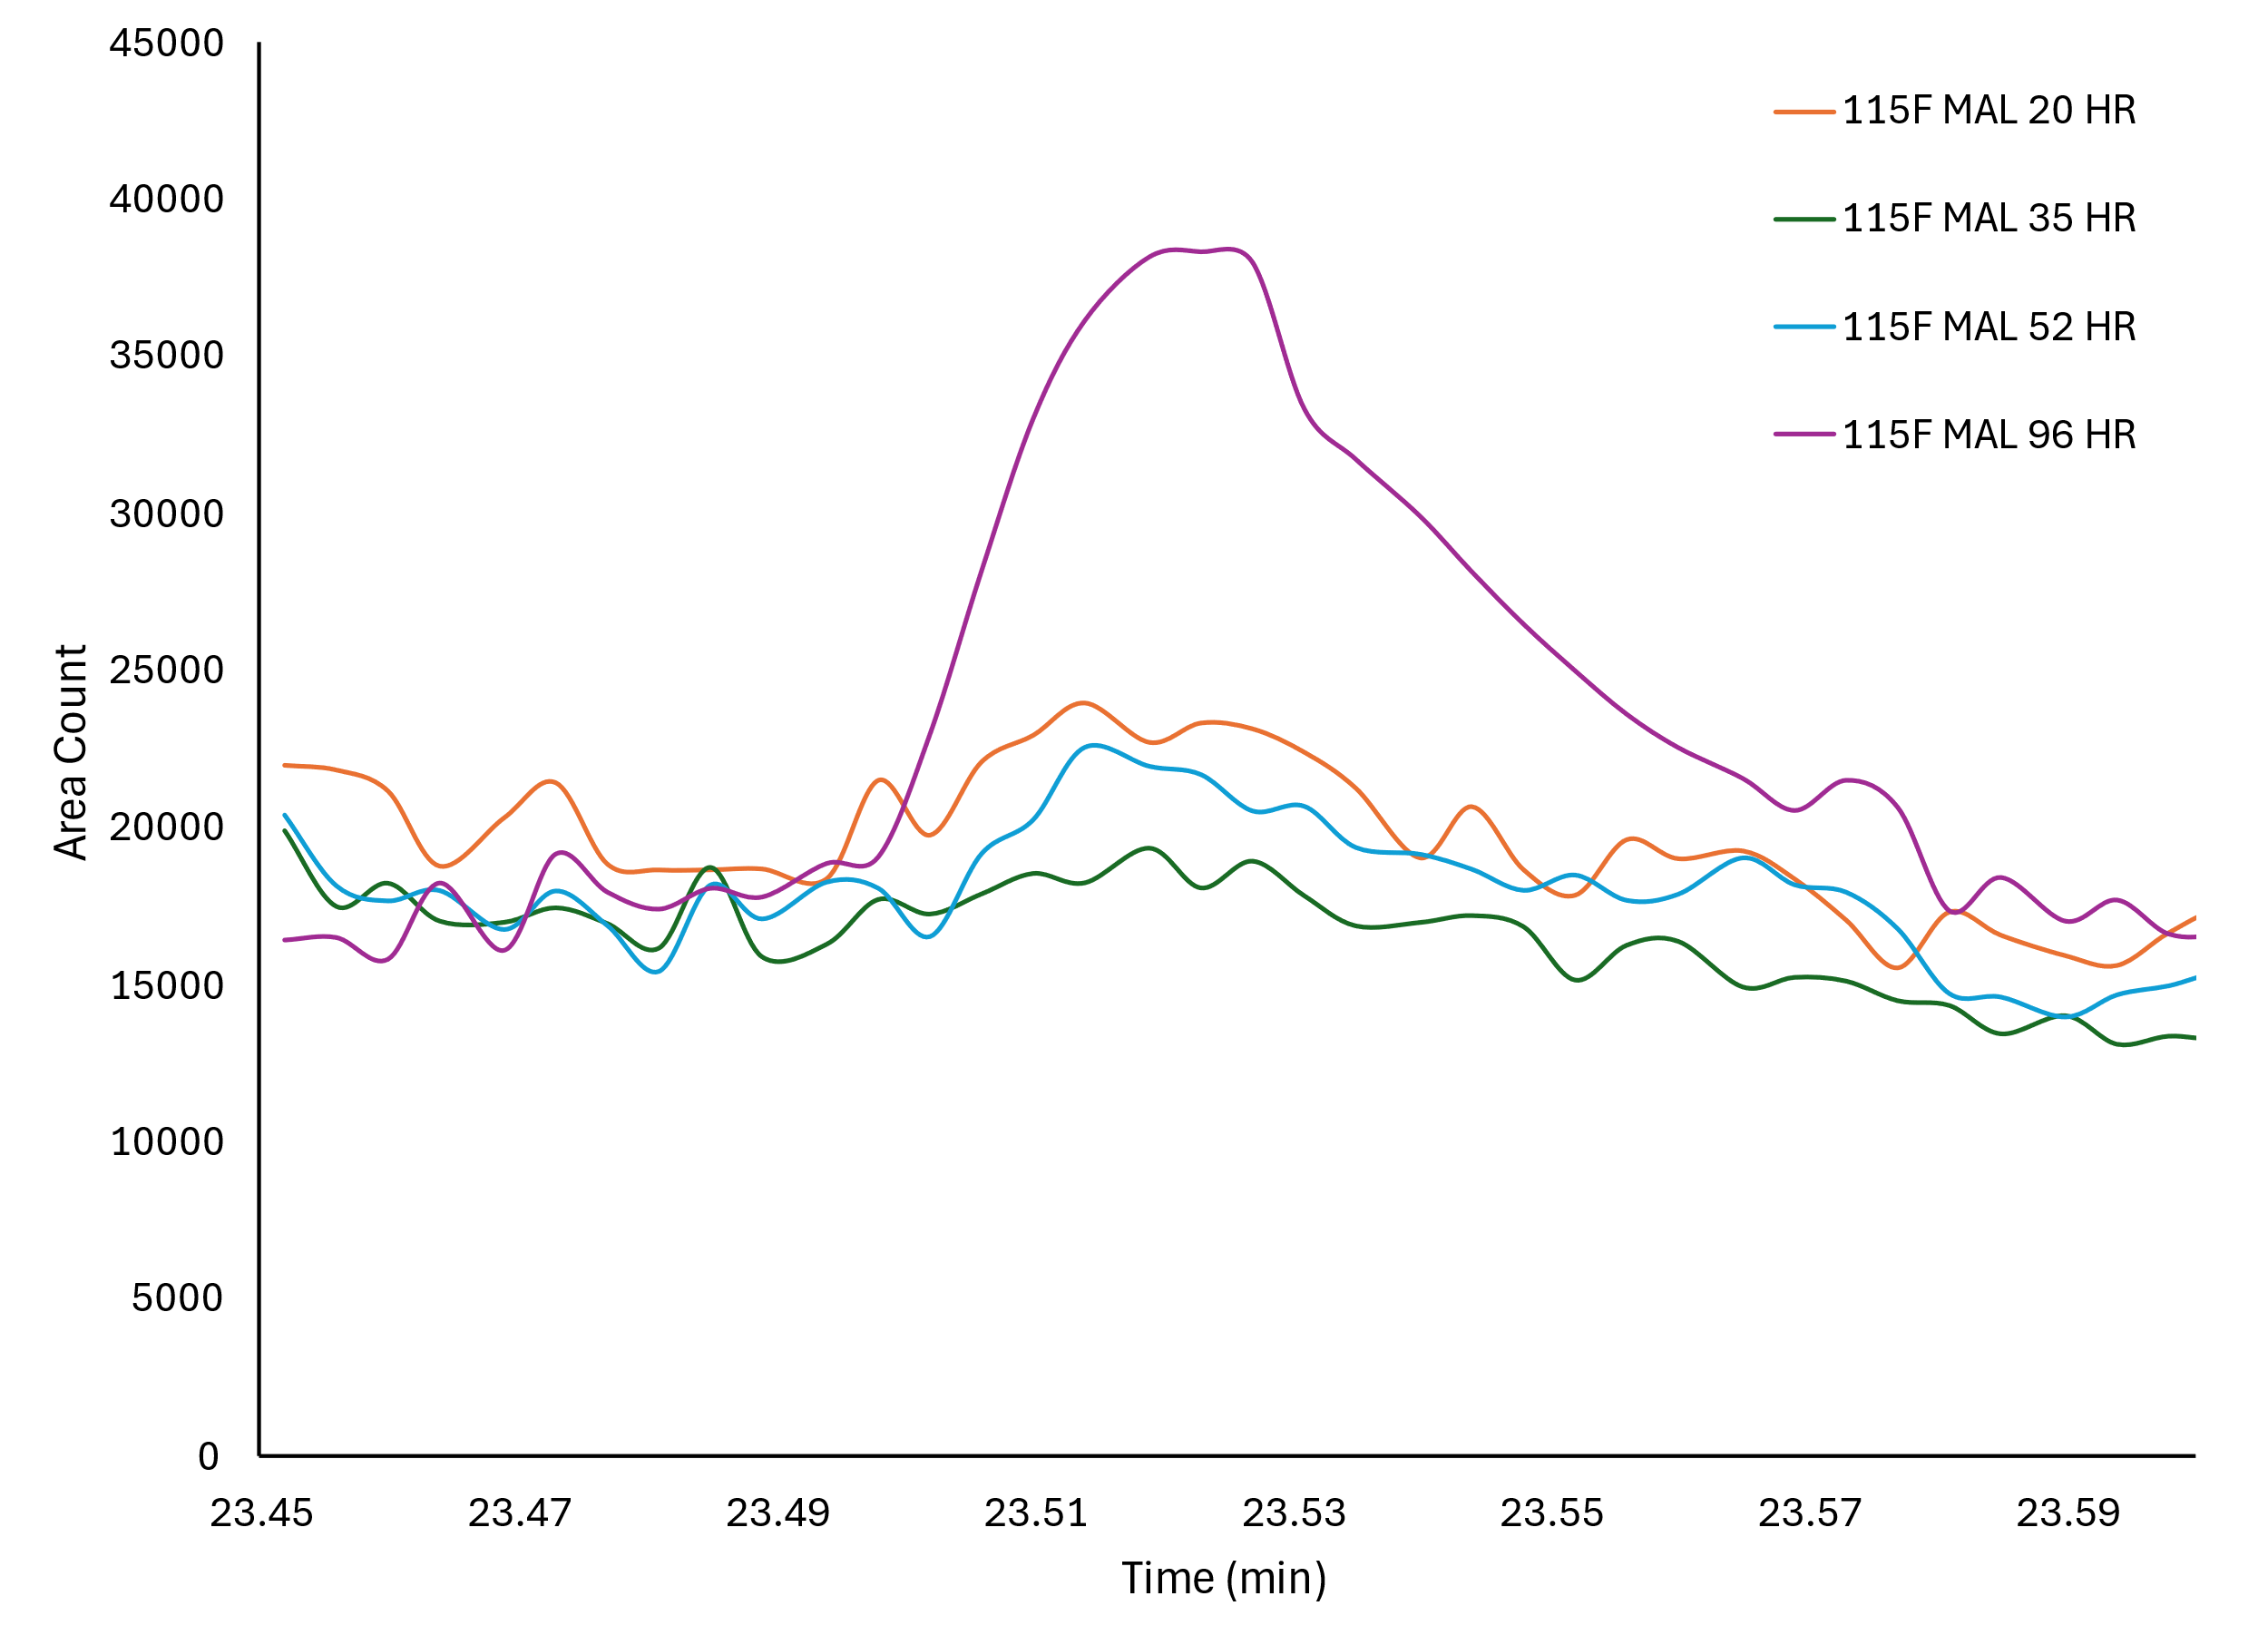


CAS 1190-29-0 Increasing then decreasing
